# Supplementary material for: Impact of design of coronary stents and length of dual antiplatelet therapies on ischaemic and bleeding events: a network meta-analysis of 64 randomized controlled trials and 102 735 patients
Source: Oxford University Press journal article supplement (doi:10.1093/eurheartj/ehx437), 2017-07-13
Supplement: eurheartj_38_42_3160_s1.doc [file eurheartj_38_42_3160_s1.doc]

*Appendix, web only*

**Impact of design of coronary stents and length of dual antiplatelet therap on ischemic and bleeding events a network meta-analysis of 64 randomized controlled trials and 102,735 patients.**

**Table of Contents**

Supplementary Methods ………………………………………………………… 3

Full research strategy key…………………………………………………………3

Table…………………………………………………………………………………4

Figures……………………………………………………………………………….5-11

References………………………………………………………………………….12-17

**Supplementary Methods.**

**Leading Study Center**

- Dipartimento di Scienze Mediche, Divisione di Cardiologia, Città della Salute e della Scienza, Turin, Italy
- Department of Mathematical Sciences "G. L. Lagrange", Politecnico di Torino, Turin, Italy

**Participating Study Centers**

- Deutsches Herzzentrum München, Lazarettstrasse 36, 80636 Munich, Technische Universität München
- Interventional Cardiology Unit, San Raffaele Scientific Institute, Milan, Italy
- Columbia University Medical Center, USA Cardiovascular Research Foundation, USA
- University Heart Center, Department of Cardiology, University Hospital Zurich, Zurich, Switzerland
- Division of Cardiology, La Sapienza, Rome, Italy; Department of Medico-Surgical Sciences and Biotechnologies, Sapienza University of Rome, Latina, Italy; Department of AngioCardioNeurology, IRCCS Neuromed, Pozzilli, Italy
- San Giovanni Bosco Hospital, Division of Cardiology, Turin, Italy

**Full research strategy key**

((drug eluting stent) OR (DES) OR (bioresorbable vascular scaffolds) OR (BVS)) AND ((coronary artery disease) OR (CAD) OR (heart*) OR (dual antiplatelet therapy) OR (DAPT)) AND ((randomized controlled trial) OR (trial) OR (RCT))

**Table S1a. Technical features of included devices.**

| **DES generation** | **DES type** | **Commercial name** | **Strut thickness (um)** | **Number of studies used it** |
| --- | --- | --- | --- | --- |
| **First** | **SES** | Cypher Select or Cypher Select plus | 140 | 18 |
|  | **Sirolimus and Probucol Eluted Stent** | Dual-DES | 87 | 1 |
|  | **PES** | Taxus express or Taxus Libertè | 132 | 11 |
| **Second** | **EES** | Xience V or Xience Prime | 81 | 35 |
|  |  | Promus or Promus Element Plus | 81 | 13 |
|  |  | Synergy | 74 | 1 |
|  | **ZES** | Endeavor | 91 | 14 |
|  |  | Resolute or Resolute Integrity | 91 | 9 |
| **Third** | **BES** | Nobori | 120 | 7 |
|  |  | Biomatrix | 137 | 2 |
|  |  | Biofreedom | 119 | 1 |
|  | **O- SES** | Orsirio | 60 | 2 |
|  | **BP- SES** | Ultimaster | 80 | 1 |
|  | **BVS** | Absorb BVS | 150 | 6 |

**Table S1b. Stent type per** study.

| **STUDY NAME** | **Group 1-DAPT duration** | **Stent type** | **Group 2-DAPT duration** | **Stent Type** | **Group 3-DAPT duration** | **Stent Type** | **Group 4-DAPT duration** | **Stent Type** | **Group5-DAPT duration** | **Stent Type** | **Group 6-DAPT duration** | **Stent Type** |
| --- | --- | --- | --- | --- | --- | --- | --- | --- | --- | --- | --- | --- |
| **SPIRIT II** | EES-12m | XIENCE V | PES-12m | Taxus express 2 or Libertè |  |  |  |  |  |  |  |  |
| **SPIRIT III** | EES-12m | XIENCE V | PES-12m | Taxus express 2 |  |  |  |  |  |  |  |  |
| **SPIRIT IV** | EES-12m | XIENCE V | PES-12m | Taxus express |  |  |  |  |  |  |  |  |
| **COMPARE** | EES-12m | XIENCE V | PES-12m | Taxus Libertè |  |  |  |  |  |  |  |  |
| **SPIRIT V Diabetes** | EES-12m | XIENCE V | PES-12m | Taxus Libertè |  |  |  |  |  |  |  |  |
| **RESET** | EES-12m | XIENCE V | SES-12m | Chyper Select-Plus |  |  |  |  |  |  |  |  |
| **SORT OUT IV** | EES-12m | XIENCE V | SES-12m | Chyper Select-Plus |  |  |  |  |  |  |  |  |
| **EXCELLENT** | EES-12m | Xience or promus | SES-12m | Chyper Select |  |  |  |  |  |  |  |  |
| **LONG DES III** | EES-12m | Promus or XIENCE V | SES-12m | Chyper Select |  |  |  |  |  |  |  |  |
| **ESSENCE DIABETES** | EES-12m | XIENCE V | SES-12m | Chyper Select or Chyper Select Plus |  |  |  |  |  |  |  |  |
| **RESOLUTE** | EES-12m | XIENCE V | ZES-12m | Resolute |  |  |  |  |  |  |  |  |
| **TWENTE** | EES-12m | XIENCE V | ZES-12m | Resolute |  |  |  |  |  |  |  |  |
| **EXAMITION** | EES-12m | Multi link vision | BMS-1m | Multi link vision |  |  |  |  |  |  |  |  |
| **BASKETPROVE** | SES-12m | Chyper select | EES-12m | XIENCE V | BMS-1m | Multi link Vision |  |  |  |  |  |  |
| **ZEST** | ZES-12m | Endeavor | SES-12m | Chyper Select | PES-12m | Taxus Libertè |  |  |  |  |  |  |
| **KOMER** | ZES-12m | Endeavor | SES-12m | Chyper Select | PES-12m | Taxus Expres |  |  |  |  |  |  |
| **NAPLES** | SES-12m | Chyper select | PES-12m | Taxus | ZES-12m | Endeavor |  |  |  |  |  |  |
| **ENDEAVOR III** | ZES-12m | Endeavor | SES-12m | Chyper Select |  |  |  |  |  |  |  |  |
| **SORT OUT III** | ZES-12m | Endeavor | SES-12m | Chyper Select or Chyper Select Plus |  |  |  |  |  |  |  |  |
| **ISAR TEST IV** | EES-12m | XIENCE V | SES-12m | Chyper |  |  |  |  |  |  |  |  |
| **ISAR TEST II** | SES-12m | Chyper | Probucol -ES-12m | Dual-DES | ZES-12m | Endeavor |  |  |  |  |  |  |
| **ENDEAVOR IV** | ZES-12m | Endeavor | PES-12m | Taxus express |  |  |  |  |  |  |  |  |
| **ENDEAVOR II** | ZES-12m | Endeavor | BMS-1m | Driver |  |  |  |  |  |  |  |  |
| **PLATINUM** | EES-12m | PROMUS | EES-12m | Promus Element Pl Cr |  |  |  |  |  |  |  |  |
| **RESOLUTE-China** | ZES-6m | Resolute | PES-6m | Taxus Libertè |  |  |  |  |  |  |  |  |
| **TROFI II** | BRS-12m | Absorb | EES-12m | Xience Xpedition |  |  |  |  |  |  |  |  |
| **EVERBIO II** | BRS-12m | Absorb | EES-12m | Promus | BES-12 | Biomatrix |  |  |  |  |  |  |
| **AbsorB-III** | BRS-12m | Absorb | EES-12m | Xience |  |  |  |  |  |  |  |  |
| **AbsorB-II** | BRS-12m | Absorb | EES-12m | Xience |  |  |  |  |  |  |  |  |
| **AbsorB-Japan** | BRS-12m | Absorb | EES-12m | Xience xpedition/prime |  |  |  |  |  |  |  |  |
| **AbsorB-China** | BRS-12m | Absorb | EES-12m | Xience V |  |  |  |  |  |  |  |  |
| **OPTIMIZE** | ZES-3m | Endeavor | ZES-12m | Endeavor |  |  |  |  |  |  |  |  |
| **PRODIGY** | ZES-24m | Endeavor | EES-24m | XIENCE V | ZES-6m | Endeavor | EES-6m | XIENCE V |  |  |  |  |
| **ITALIC** | EES-6m | XIENCE V | EES-24m | XIENCE V |  |  |  |  |  |  |  |  |
| **TUXEDO-India** | EES-12m | Xience Prime | PES-12m | Taxus |  |  |  |  |  |  |  |  |
| **LEADERS FREE** | BES-1m | Biofreedom | BMS-1m |  |  |  |  |  |  |  |  |  |
| **NEXT** | BES-12m | Biofreedom | EES-12m | Xience Promus |  |  |  |  |  |  |  |  |
| **EVOLVE II** | EES-12m | Synergy | EES-12m | Promus |  |  |  |  |  |  |  |  |
| **BIO FLOW II** | SES-12m | Osyro | EES-12m | Xience |  |  |  |  |  |  |  |  |
| **Century II** | SES-12m | Ultimaster | EES-12m | Xience |  |  |  |  |  |  |  |  |
| **DES LATE** | EES-12m | na | ZES-12m | na | EES-24m | na | ZES-24m |  |  |  |  |  |
| **SECURITY** | EES-6m | Promus or Xience V | EES-12m | Promus or Xience V | ZES-6m | Endeavor Resolute | ZES-12m | Endeavor Resolute | BES-6m | Nobori/ Biomatrix | BES-12m | Nobori /Biomatrix |
| **DAPT** | ZES-12m | Endeavor | ZES-30m | Endeavor | EES-12m | Xience or Promus | EES-30m | Xience or Promus |  |  |  |  |
| **OPTIDUAL** | EES-12m | na | EES-48m | na | ZES-12m | na | ZES-48m | na |  |  |  |  |
| **XIMA** | EES-12m | Xience | BMS-1m | Vision |  |  |  |  |  |  |  |  |
| **CTO-IVUS** | ZES-12m | Resolute | PES-12m | Nobori |  |  |  |  |  |  |  |  |
| **PLATINUM-China** | PES-12m | Taxus | EES-12m | Promus Element |  |  |  |  |  |  |  |  |
| **SORT OUT VI** | ZES-12m | Resolute | PES-12m | Biomatrix |  |  |  |  |  |  |  |  |
| **ZEUS** | BMS-1m | Tsunami, Skylor, Integrity, Vision e Avant Garde | ZES-1m | Endeavor |  |  |  |  |  |  |  |  |
| **LEADERS 4Y** | PES-12m | Biomatrix | SES-12m | Chyper Select |  |  |  |  |  |  |  |  |
| **NOBORI-Japan** | PES-12m | Nobori | SES-12m | Chyper |  |  |  |  |  |  |  |  |
| **PROTECT** | ZES-12m | Endeavor | SES-12m | Chyper |  |  |  |  |  |  |  |  |
| **APPENDIX-AMI** | EES-12m | XIENCE V | SES-12m | Chyper |  |  |  |  |  |  |  |  |
| **ISAR SAFE** | EES-6m | Several | EES-12m | several | ZES-6m | Several [4% endeavor; 11% Resolute] | ZES-12m | Several [4% endeavor; 11% Resolute] | BES-6m | Several | BES-12m | Several |
| **SORT OUT V** | BES-12m | Nobori | SES-12m | Chyper |  |  |  |  |  |  |  |  |
| **ISAR-LEFT-MAIN 2** | ZES-12m | Resolute | EES-12m | Xience |  |  |  |  |  |  |  |  |
| **DUTCH PEERS** | P-ZES 12 [Resolute] | Resolute | EES-12m | Xience |  |  |  |  |  |  |  |  |
| **RACE-MI** | EES-12m | na | SES-12m | na |  |  |  |  |  |  |  |  |
| **HOST-ASSURE** | EES-12m | Promus Element | ZES-12m | Resolute |  |  |  |  |  |  |  |  |
| **COMPARE II** | BES-12m | Nobori | EES-12m | Xience or Xience Prime or Xience promus |  |  |  |  |  |  |  |  |
| **NOBORI I** | BES-12m | Nobori | PES-12m | Taxus |  |  |  |  |  |  |  |  |
| **BIOSCIENCE** | SES-12m | Osyro | EES-12m | Xience Xpedition |  |  |  |  |  |  |  |  |
| **LONG DES V** | BES-12m | Nobori | EES-12m | XIENCE V |  |  |  |  |  |  |  |  |
| **COMFORTABLE AMI** | BES-12m | Biomatrix | BMS-1m | na |  |  |  |  |  |  |  |  |

**Table S2a. Baseline population features of included studies**.

|  | **Age (yrs)** | **Female gender (%)** | **DM (%)** | **DMNID(%)** | **IDDM (%)** | **Hyperdyslipidemia (%)** | **Hypertension** | **Smoke (current)** | **Family history** | **Previous AMI** | **previous CABG** | **Previous PCI** | **BMI** | **Renal disease (%)** | **ACS as clinical presentation (%)** | **STEMI (%)** | **NSTEMI (%)** | **UA (%)** | **Stable angina (%)** |
| --- | --- | --- | --- | --- | --- | --- | --- | --- | --- | --- | --- | --- | --- | --- | --- | --- | --- | --- | --- |
| **Leadersfree** | 75 | 30 | 34 |  |  | 62 | 78,5 |  |  | 20,2 | 9,7 | 22 | 27,3 |  | 42 | 4 | 22 | 15 | 58 |
| **Next** | 69 | 23 | 46 | 36 | 10 | 78 | 81,5 | 18,5 |  | 28 | 5,1 | 50,5 | 24,7 |  | 17 | 17 |  |  | 83 |
| **Nobori** |  | 63 | 23 | 16 | 7 | 9 | 79 | 21 | 5,2 | 20,8 | 1,5 | 35 |  |  | 24 | 0 | 0 | 24 | 56 |
| **Long DES V** | 63 | 32 | 32 |  |  | 64 | 62,5 | 28,2 | 6,6 | 3,4 | 0,2 | 8,4 | 25 |  | 42 |  | 4 | 27 | 58 |
| **Comfortable AMI** | 60 | 20 | 15 |  |  | 57 | 47 | 49,5 | 32,1 |  |  |  | 27,2 |  | 100 | 100 | 0 | 0 | 0 |
| **Evolve II** | 64 | 23 | 31 | 12 | 20 | 74 | 76 | 22 | 8,5 | 27,5 | 5 | 36,5 |  |  | 50 |  |  |  | 50 |
| **BIO FLOW II** | 67 | 22 | 28 | 7 | 21 | 68 | 77 | 27,4 |  | 25 |  |  |  |  |  |  |  |  |  |
| **Century II** | 65 | 25 |  |  |  |  | 73 | 20 | 30,4 | 21 | 2,6 | 31,2 | 26 |  | 36 | 0 | 23 | 13 | 64 |
| **Bioscence** | 66 | 23 | 24 | 16 | 8 |  | 67,7 | 29 | 28 | 20 | 9,8 | 29,1 | 27,6 | 15 | 55 | 20 | 27 | 7 | 45 |
| **Absorb China** | 57 | 29 |  | 16 | 9 | 43 | 59,6 | 34 |  | 16,3 |  | 8,8 | 25,2 |  | 64 | 0 | 0 | 64 | 22 |
| **Absorb III** | 64 | 30 |  | 21 | 10 | 86 | 85 | 21 |  |  |  |  | 30,5 | 11 | 26 | 0 | 0 | 26 | 74 |
| **Absorb II** | 61 | 24 |  | 20 | 4 | 75 | 70 | 23 | 35 | 28 |  |  | 28 |  | 26 | 0 | 0 | 26 | 64 |
| **Absorb Japan** | 67 | 22 |  | 25 | 9 | 82 | 78,8 | 20,5 | 7 | 6,5 |  |  | 24 |  | 10 | 0 | 0 | 10 | 90 |
| **Everbio II** | 65 | 20 |  | 10 | 6 | 63 | 61,5 | 35 | 29 | 18 | 15 | 30 |  |  | 36 | 8 | 20 | 6 | 67 |
| **Trofi II** | 59 | 24 |  | 15 | 5 | 64 | 38 | 49 |  | 2,6 |  | 3,6 | 27,4 |  | 100 | 100 | 0 | 0 | 0 |
| **TuxedoIndia** | 58 | 26 | 100 | 60 | 40 | 77 | 66,6 | 15 |  | 40,5 | 1,7 | 7,9 | 25,8 |  | 54 | 10 |  |  | 46 |
| **Dapt study** | 61 | 24 |  | 31 |  | 75 | 75 | 24,6 |  | 21,6 | 11,6 | 30,7 | 30,5 |  | 38,2 | 10 | 15,5 | 16,7 | 37 |
| **Resolute china** | 59 | 20,5 | 25,9 |  |  | 43 | 65 | 40,5 |  | 34 | 17,8 |  |  |  | 90 |  |  | 66 | 9,5 |
| **Spirit II** | 62 | 27 | 23,26 |  |  | 70,54 | 66 | 32 |  | 32 |  |  |  |  | 28 | 0 | 0 | 28 | 72 |
| **Spirit III** | 63 | 31 | 29 | 24 | 5 | 73,3 | 76 | 23 |  | 19 |  |  |  |  | 21 | 0 | 0 | 21 | 79 |
| **Spirit IV** | 63 | 32 | 32,2 | 23,3 | 8,9 | 75,9 | 77 | 22 |  | 21 |  |  |  |  | 28,1 | 0 | 0 | 28,1 | 71,9 |
| **Compare** | 63 | 29,5 | 18 |  |  | 51,6 | 48 | 31 | 45 | 17 | 7 | 14 |  | 3 | 59,5 | 25,1 | 22,9 | 12 | 37,9 |
| **Spirit V Diabetes** | 65 | 31 | 100 | 71,7 | 28,3 | 65,3 | 78 | 16 |  | 33,5 |  |  |  |  | 36,6 | 0 | 0 | 36,6 | 47,7 |
| **italic** | 63 | 20 |  | 32 |  | 64 | 65 | 52 |  | 15 | 6 | 23 | 27 | 3 | 24 | 0 | 24 | 0 | 76 |
| **SORT OUT IV** | 64,1 | 24,4 | 14,1 |  |  | 71,1 | 55,6 | 30 |  | 22 | 9 | 21 | 27,5 |  |  | 9,7 | 32,8 |  | 55 |
| **Optimize** | 61 | 37 |  | 25 | 10 | 63 | 87 | 18 | 42 | 34,7 | 7,6 | 20 |  | 7 | 36 | 0 | 36 | 0 | 64 |
| **LONG DES 3** | 63 | 30,2 | 29,5 |  |  | 56,65 | 59 | 22,2 |  | 3,8 | 2 | 7,5 |  |  | 42,2 | 0 | 6,4 | 35,8 | 45,3 |
| **ESSENCE DIABETES** | 63,3 | 41 | 100 | 84,7 | 15,3 | 38,3 | 70,6 | 24 |  | 1,7 | 0,7 | 5,7 |  |  | 41,7 | 5,3 |  | 36,4 | 58,3 |
| **RESOLUTE** | 64,3 | 77 | 23,25 | 15,45 | 7,8 | 65,9 | 71,2 | 26,5 | 29 |  |  |  |  |  | 47,95 | 28,85 |  | 19,1 | 34,8 |
| **TWENTE** | 64,2 | 27,5 | 78,4 |  |  | 59,2 | 55,6 | 25 | 53,2 | 32 | 10,5 | 20,5 | 27,7 | 2,7 | 51,6 | 0 | 28,2 | 23,4 | 48,5 |
| **EXAMINATION** | 61,2 | 17,4 | 17,3 |  |  | 43,8 | 48 |  | 17 | 5,3 | 0,6 | 4,2 |  |  | 100 | 100 | 0 | 0 | 0 |
| **ISAR TEST IV** | 66,75 | 23,15 | 28,9 | 19,55 | 9,35 | 64,75 | 68 | 16 |  | 28,6 | 9,9 |  |  |  | 39,8 | 10,7 |  | 29,1 | 60,2 |
| **PLATINUM** | 63,6 | 28,7 | 23,6 | 16,7 | 6,9 | 77,2 | 72 | 19,5 |  | 21 |  |  |  |  | 24,4 | 0 | 0 | 24,4 | 75,6 |
| **BASKET PROVE** | 66 | 24 | 16 |  |  | 63 | 62 | 33 |  | 12 | 3 | 13 |  |  | 65 | 32,5 | 32,5 |  | 35 |
| **NAPLES** | 64 | 42 | 100 | 63,3 | 26,7 | 62 | 74,3 | 18,6 | 25,7 | 41,6 |  |  | 28 |  | 14,1 | 0 | 0 | 14,1 | 59,7 |
| **ISAR TEST II** | 66,9 | 23,3 | 27,4 |  |  | 65,8 | 67,3 | 18,5 |  | 27,2 | 8,9 |  |  |  | 41,8 | 13,3 |  | 28,5 | 58,2 |
| **ZEST** | 61,9 | 33,9 | 28,7 | 24,9 | 3,8 | 51,6 | 61 | 28 | 5,4 | 4,1 | 0,7 | 9 | 25 |  | 55,26 | 0 | 8,5 | 46,76 | 39,1 |
| **KOMER** | 60 | 21 | 20,8 |  |  | 31,9 | 41,7 |  | 2,9 | 2 | 0 | 2,8 |  |  | 100 | 100 | 0 | 0 | 0 |
| **ENDEAVOR III** | 61,5 | 30,5 | 29,3 |  |  | 84,3 | 71 |  |  | 20 | 6 | 21 |  |  | 0 | 0 | 0 | 0 | 100 |
| **SORT OUT III** | 64,3 | 26,5 | 14,5 |  |  | 66 | 50,5 | 30 | 43 | 25,5 | 6,5 | 18,5 | 27,3 |  | 45,5 | 7,5 | 38 |  | 52 |
| **ENDEAVOR IV** | 63,55 | 32,3 | 30,7 |  |  | 83,1 | 81 |  |  | 22 | 9 | 29 |  |  | 53,2 | 2,45 |  | 50,75 | 46,8 |
| **ENDEAVOR II** | 61,5 | 26 | 20 |  |  | 79 |  | 35 |  | 41 |  | 20 |  |  | 30 | 0 | 0 | 30 | 70 |
| **ProdigysolodesII** | 69 | 26 |  | 20 | 5 | 50 |  |  |  |  |  |  |  |  | 77 | 33 | 23 | 19 | 23 |
| **RESET** | 69,1 | 23 | 45 | 34,5 | 10,5 | 74,5 | 80 | 21 | 19 | 30 | 5 | 49 | 24,3 | 7,6 | 17,9 | 5,9 | 0 | 12 | 82 |
| **EES des late** | 55 | 23 |  | 22 | 7 | 65 |  |  |  |  |  |  |  |  | 30 | 5 | 35 | 25 | 80 |
| **SECURITY** | 65 | 22 |  | 23 | 6 | 65 | 72 | 22 |  | 10 | 5,5 | 18 |  |  | 38 | 0 | 39 | 0 | 61 |
| **OPTIDUAL** | 65 | 22,5 | 33 |  |  | 64 | 58,5 | 59 | 30 | 17,5 | 5,2 | 26,4 |  |  | 36 | 12 | 14,5 | 9,5 | 33 |
| **XIMA TRIAL** | 83 | 40 | 25 |  |  | 54 | 76 | 4,5 |  | 26 | 6,1 | 11,3 |  | 6,5 | 68 |  |  | 18 | 32 |
| **CTO-IVUS** | 61 | 19 | 34 |  |  |  | 63,1 | 34,8 |  | 8 | 2 | 15,7 |  |  | 0 | 0 | 0 | 0 | 100 |
| **PLATINUM CHINA** | 57 | 30 | 28 | 8 | 20 | 29 | 57 | 37,8 | 11,7 | 24 | 0,2 | 21 |  |  | 79 | 0 | 0 | 79 | 16 |
| **SORT OUT VI** | 66 | 24 | 18 |  |  | 59,2 | 59 | 30,7 |  | 19,2 | 7,4 | 21 | 26,9 |  | 51 | 18 |  |  | 45,2 |
| **ZEUS** | 73,4 | 29 | 26 |  |  | 48 | 74,4 | 21 |  | 23,8 | 7 | 18,9 | 26,6 | 41 | 63,2 | 19 | 27,3 | 16,8 | 36,7 |
| **leaders4** | 64 | 25 | 26 | 17 | 9 | 65 |  |  |  |  |  |  |  |  | 54 | 15 | 16 | 22 | 45 |
| **Nobor Japan** | 67 | 30 | 38 | 29 | 9 | 77 | 80 | 24,2 | 5,2 | 20,8 | 1,3 | 35 |  |  | 17 | 0 | 0 | 17 | 83 |
| **protect** | 62 | 23 | 27 | 20 | 7 | 62 |  |  |  |  |  |  |  |  | 41 | 8 | 18 | 18 | 49 |
| **XAMI** | 61 | 33 | 9 |  |  |  | 47 | 25 | 55,6 | 22,5 | 12,5 | 20,1 |  |  | 100 | 93 | 7 |  |  |
| **ISAR SAFE** | 68 | 19 | 24 | 16 | 8 | 92 | 90,6 | 15 | 36,1 | 25,2 | 7,6 |  | 27,5 |  | 38 | 6 | 11 | 21 | 50 |
| **SORT OUT V** | 65 | 25 | 15 |  |  | 61 |  |  |  |  |  |  |  |  | 49 | 18 | 15 | 15 | 49 |
| **ISAR-LEFT-MAIN 2** | 70 | 25 | 28 | 15 | 10 | 71 | 69 | 14 |  | 30 |  | 52,8 | 27,3 |  | 36 |  |  |  |  |
| **DUTCH PEERS** | 65 | 27 | 18 | 11 | 7 | 47 | 54 | 25 | 50 | 22 | 9,5 | 19 | 27,1 | 4 | 68 | 20 | 24 | 13 | 41 |
| **RACE-MI** | 59 | 33 | 26 | 16 | 10 |  | 41,6 |  | 34 | 13,1 | 7,4 | 10,9 |  | 8,4 | 100 | 100 | 0 | 0 | 0 |
| **HOST-ASSURE** | 63 | 23 | 32 |  |  | 64 | 68,2 | 31,7 |  | 4,3 | 0,7 | 9,7 | 24,6 | 2,8 | 66 | 11,3 | 17 | 36 | 29 |
| **COMPARE II** | 63 | 74 | 22 |  |  |  | 48 | 31,5 | 44,5 | 16,5 | 6,5 | 13,5 |  | 4,3 | 60 | 21 | 26 | 10 | 40 |
| **EXCELLENT** |  |  |  |  |  |  | 73,3 | 26,6 | 8,8 | 5,1 | 1,2 | 8,9 | 25 |  |  |  |  |  |  |

**Table S2b. Angiographic features of included studies**

|  | **Radial access (%)** | **More than 2 lesions** | | **Multivessel(%:moreor equal than 2 vessels)** | **Lenght of lesion (mm)** | | **Average stent diameter at the target lesion** | | **Type C lesion (%)** | | **Bifurcation (%)** | **N of stents (per patient)** | | **Post-dilatation (%)** | | **Lenght of stents (mm)** |  |
| --- | --- | --- | --- | --- | --- | --- | --- | --- | --- | --- | --- | --- | --- | --- | --- | --- | --- |
| **LEADERS FREE** |  |  | |  |  | |  | |  | |  |  | |  | |  |  |
| **NEXT** |  |  | | 13 |  | | 2,88 | | 22 | |  |  | | 74 | | 19 |  |
| **NOBORI I** |  |  |  | |  | 2,9 | | 20 | |  | | |  | | 30 | 24 | |
| **Long DES V** |  |  | | 50 |  | | 3,2 | | 16 | |  |  | | 77 | | 26 |  |
| **COMFORTABLE AMI** |  |  | |  | 25 | | 3,2 | |  | |  |  | |  | |  |  |
| **Evolve II** |  | 22 | |  |  | |  | | 57 | |  |  | | 61 | | 14 |  |
| **BIO FLOW II** |  |  | |  |  | |  | |  | |  |  | |  | |  |  |
| **Century II** |  |  | |  |  | |  | | 30 | |  |  | | 59 | | 16 |  |
| **Bioscience** |  |  | |  | 26 | | 3,05 | |  | |  |  | |  | |  |  |
| **Absorb China** |  |  | | 36 |  | | 3,1 | | 27 | |  |  | |  | | 23 |  |
| **Absorb III** |  | 9 | |  | 12 | | 3,16 | | 30 | |  |  | | 65 | | 21 |  |
| **Absorb II** |  | 9 | | 9 |  | |  | | 2 | |  |  | | 61 | | 14 |  |
| **Absorb Japan** |  | 9 | |  |  | |  | | 24 | |  |  | | 82 | | 20 |  |
| **Everbio II** |  | 8 | |  |  | | 3 | | 18 | |  |  | | 31 | | 22 |  |
| **Trofi II** |  | 10 | |  |  | | 3,6 | |  | |  |  | | 51 | | 21 |  |
| **TuxedoIndia** |  | 25 | |  | 20 | |  | |  | |  |  | |  | |  |  |
| **Dapt study** |  |  | |  |  | |  | | 26 | |  |  | |  | |  |  |
| **Resolute china** |  | 22,6 | |  | 18,7 | |  | | 70 | | 15,45 | 1,7 | |  | |  |  |
| **Spirit II** |  |  | |  | 13 | |  | |  | |  |  | |  | |  |  |
| **Spirit III** |  |  | |  | 14,7 | | 3 | |  | |  | 1,3 | |  | | 22 |  |
| **Spirit IV** |  | 3,3 | | 25 | 14,7 | |  | |  | |  | 1,48 | | 44,9 | | 21,9 |  |
| **Compare** |  |  | | 26,5 | 16,4 | | 2,55 | | 45,5 | | 17,5 |  | | 53 | | 28 |  |
| **Spirit V Diabetes** |  | 5,3 | | 28,3 | 18,1 | |  | | 16 | | 32,4 |  | |  | |  |  |
| **italic** |  | 33 | |  |  | | 3,1 | |  | |  |  | |  | | 33 |  |
| **SORT OUT IV** |  | 5,1 | | 23,4 | 16,7 | | 3,2 | | 38,2 | | 12,5 | 1,6 | |  | |  |  |
| **Optimize** |  |  | | 25 | 18 | |  | | 37 | | 15 |  | | 45 | | 33 |  |
| **LONG DES 3** |  |  | |  | 34,1 | | 3,2 | |  | | 40,7 | 1,75 | |  | | 46,45 |  |
| **ESSENCE DIABETES** |  |  | | 55 | 23,2 | |  | |  | |  | 1,3 | | 71,9 | | 28,7 |  |
| **RESOLUTE** |  |  | |  |  | |  | |  | |  | 1,95 | |  | | 35,7 |  |
| **TWENTE** |  | 10,1 | | 24,2 | 14,43 | | 2,97 | | 38,1 | | 24,5 | 2,02 | | 81,6 | | 40,97 |  |
| **EXAMINATION** |  |  | |  |  | |  | |  | |  | 1,38 | | 14,7 | | 23 |  |
| **ISAR TEST IV** |  | 26,1 | | 86,4 | 15 | |  | | 72 | | 22,7 |  | |  | |  |  |
| **PLATINUM** |  | 0,05 | | 10,5 | 12,75 | | 3,07 | |  | |  | 1,18 | | 49,5 | | 20,1 |  |
| **BASKET PROVE** |  |  | | 42,5 |  | |  | |  | | 8 | 1,65 | |  | | 30,8 |  |
| **NAPLES** |  | 40,3 | | 80,5 | 23 | |  | | 75 | | 18,3 |  | |  | |  |  |
| **ISAR TEST II** |  | 58,7 | | 83 | 14,4 | |  | | 73 | | 20,5 |  | |  | |  |  |
| **ZEST** |  |  | | 47,4 |  | | 3,4 | | 74 | | 13,8 | 1,6 | |  | | 38,9 |  |
| **KOMER** |  |  | | 40 | 19,3 | | 3,2 | |  | |  |  | |  | | 24,2 |  |
| **ENDEAVOR III** |  | 9,4 | | 38,8 | 14,97 | | 3,1 | | 64,6 | |  | 1,15 | |  | | 22,5 |  |
| **SORT OUT III** |  | 8,5 | | 29,5 | 13,5 | | 3,2 | | 34,5 | |  | 1,7 | |  | | 18 |  |
| **ENDEAVOR IV** |  | 16,6 | | 44 | 13,6 | | 3,04 | | 70,4 | |  | 1,09 | |  | | 21,2 |  |
| **ENDEAVOR II** |  |  | |  | 14,2 | | 3,08 | | 26 | |  |  | |  | | 23,4 |  |
| **ProdigysolodesII** |  | 12 | | 65 |  | |  | | 33 | |  |  | |  | | 39 |  |
| **RESET** |  |  | | 47 | 16,9 | | 2,97 | |  | | 39,5 | 1,5 | | 71,5 | | 31,3 |  |
| **EES des late** |  | 27 | | 47 | 19 | |  | |  | |  |  | |  | | 19 |  |
| **Security** |  | 29 | | 44 |  | | 3 | | 21 | | 14 |  | | 52 | | 19 |  |
| **OPTIDUAL** |  |  | | 60 |  | | 3 | |  | |  |  | |  | | 18 |  |
| **XIMA TRIAL** | 56 | 9 | | 38 |  | |  | |  | |  | 2 | |  | | 25 |  |
| **CTO-IVUS** | 26 |  | | 65 |  | | 2,9 | | 100 | |  |  | |  | | 42 |  |
| **PLATINUM CHINA** |  |  | |  | 16 | |  | | 77 | |  |  | | 67 | | 25 |  |
| **SORT OUT VI** |  | 4,4 | |  | 15,5 | |  | | 33,5 | | 12,6 |  | |  | | 19 |  |
| **ZEUS** |  | 34 | | 26 | 16,4 | | 3 | |  | |  | 1,7 | |  | | 28 |  |
| **LEADERS 4** |  | 37 | | 24 | 13 | |  | | 17 | |  | 1,3 | |  | |  |  |
| **NOBORI Japan** |  |  | | 12 |  | |  | | 45 | |  |  | |  | |  |  |
| **PROTECT** |  |  | |  | 18 | |  | | 54 | | 17 | 1,6 | |  | |  |  |
| **XAMI** |  |  | | 50 |  | | 3,1 | | 33 | |  |  | |  | | 25 |  |
| **ISAR SAFE** |  | 9 | | 64 |  | |  | |  | | 20 | 1,7 | |  | | 28 |  |
| **SORT OUT V** |  | 26 | | 6 | 18 | |  | | 38 | | 15 | 1,25 | |  | | 15 |  |
| **ISAR-LEFT-MAIN 2** |  | 70 | | 70 |  | |  | |  | |  |  | |  | |  |  |
| **DUTCH PEERS** |  |  | |  | 13,6 | | 3 | | 30 | | 22 | 1,8 | | 74 | | 22 |  |
| **RACE-MI** |  | 49 | | 11 |  | | 3,13 | |  | |  |  | |  | |  |  |
| **HOST-ASSURE** |  | 30 | | 6 | 19,8 | | 3,16 | |  | | 25 | 1,6 | |  | | 27,7 |  |
| **COMPARE II** |  | 25 | | 25 | 17 | |  | | 31 | | 6,5 | 1,5 | |  | | 17 |  |
| **EXCELLENT** |  |  | |  |  | |  | |  | |  |  | |  | |  |  |

**Table S3: MACE. Probability of non−inferiority of Bioreabosorbable with DAPT=12m. vs each other group.**


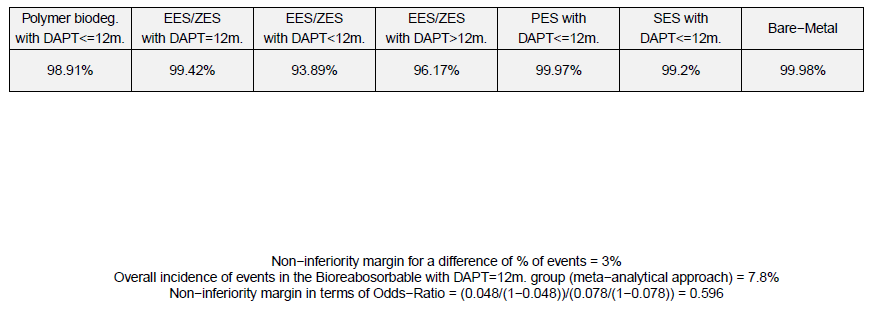


**Table S**4: GRADE assessing of network meta-analysis evidences for MACE

| **Bioreabsorbable with 12mDAPT** |  |  |  |  |  |  |  |
| --- | --- | --- | --- | --- | --- | --- | --- |
| Very low | **EES/ZES with 12mDAPT** |  |  |  |  |  |  |
| Very low | Low | **Biodeg. Polymer with 12m<=DAPT** |  |  |  |  |  |
| Very low | Low | Very low | **EES/ZES wit DAPT<12m** |  |  |  |  |
| Very low | Low | Very low | Very low | **PES with DAPT<=12m** |  |  |  |
| Very low | Low | Low | Very low | Very low | **SES with DAPT<=12m** |  |  |
| Very low | Very low | Low | Very low | Very low | Very low | **EES/ZES DAPT>12m** |  |
| Very low | Low | Low | Very low | Very low | Very low | Very low | **BMS with 12m<=DAPT** |

**Figure S1. Rank probabilities for MACE.**


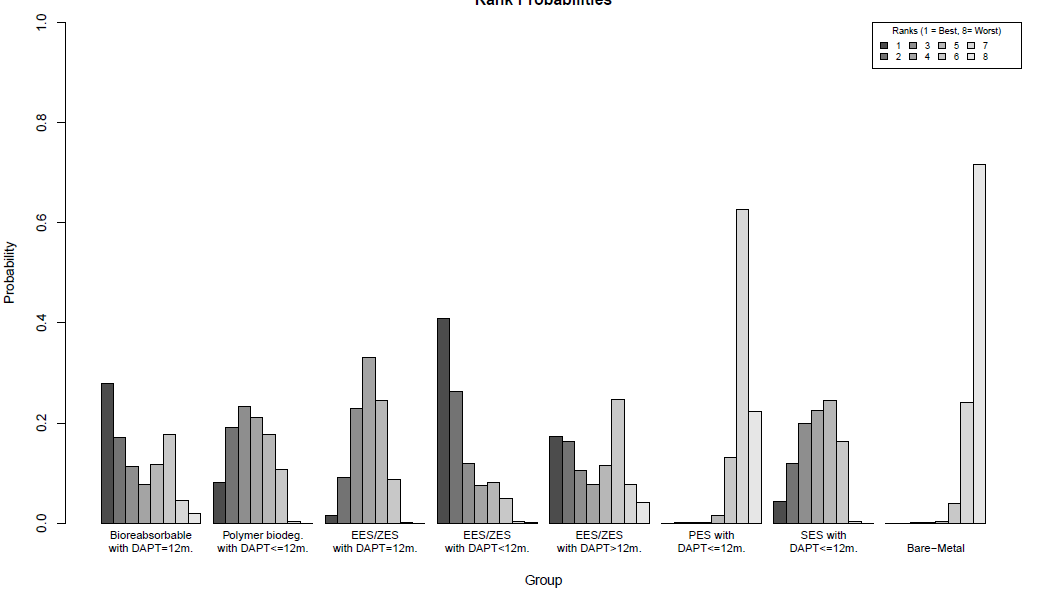


**Figure S2. SUCRA values for MACE.**


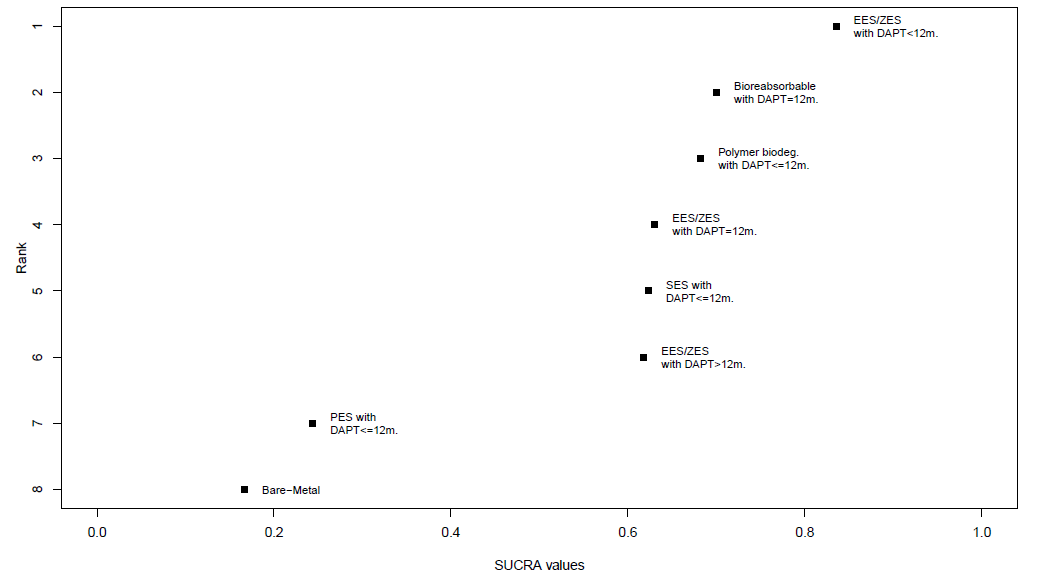


**Figure S3. Rank probabilities for myocardial infarction.**


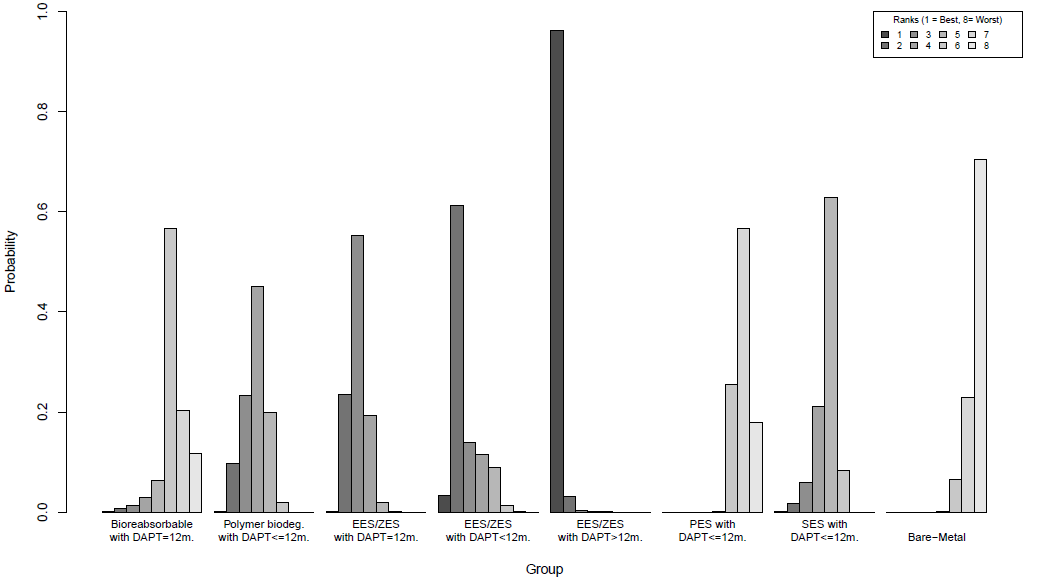


**Figure S4. SUCRA values for myocardial infarction.**


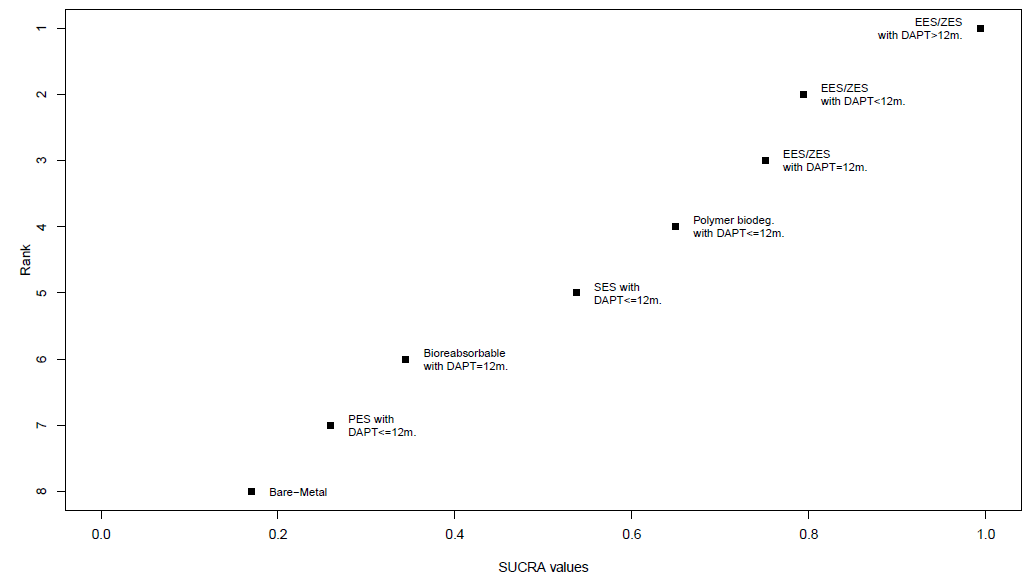


**Figure S5. Rank probabilities for definite stent thrombosis.**


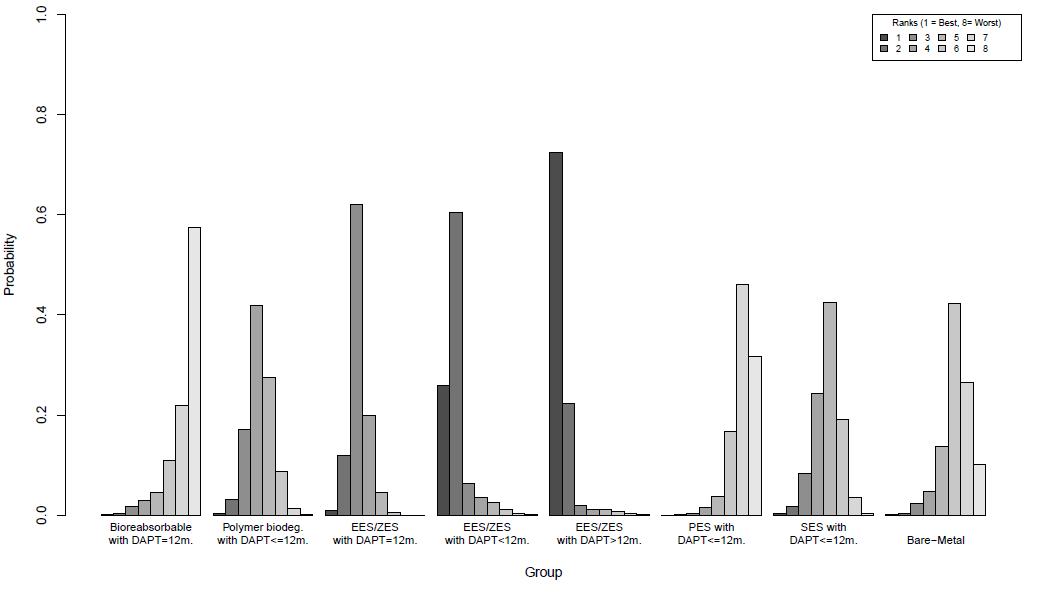


**Figure S6. SUCRA values for stent thrombosis.**


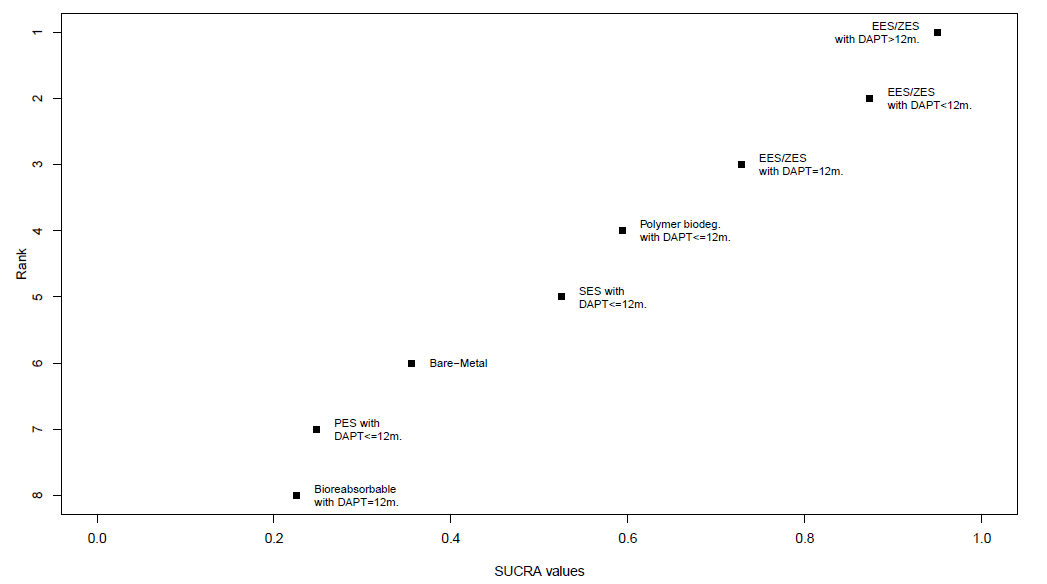


**Figure S7. Rank probabilities for target vessel revascularization**


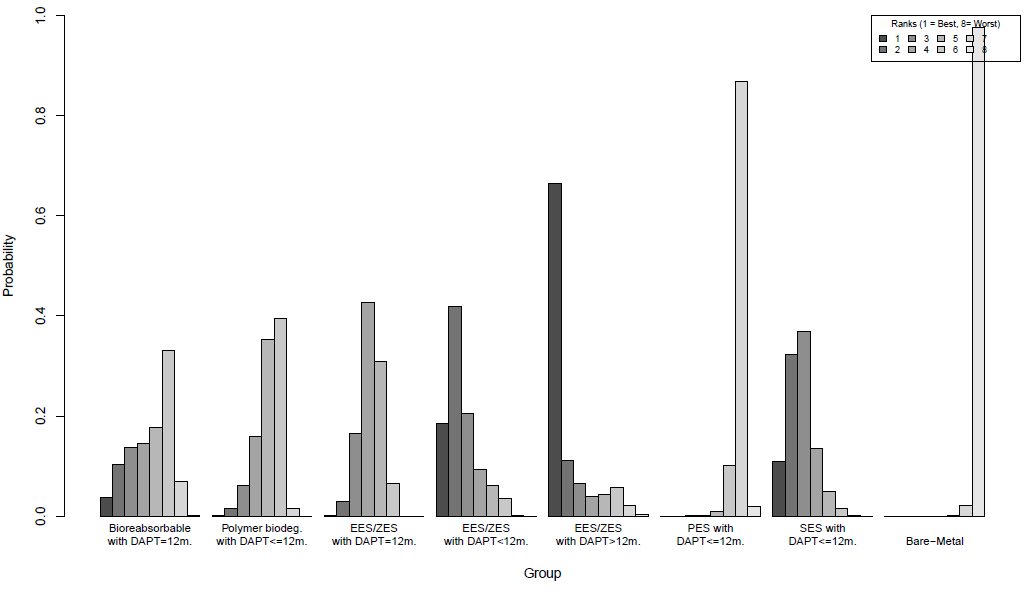


**Figure S8. SUCRA values for target vessel revascularization.**


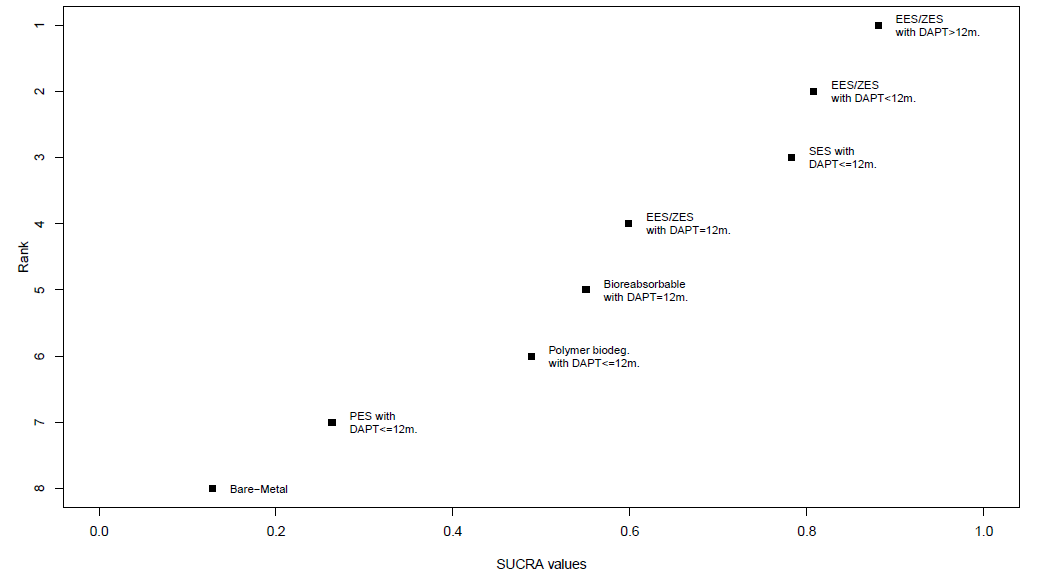


**Figure S9. Rank probabilities for target lesion revascularization**


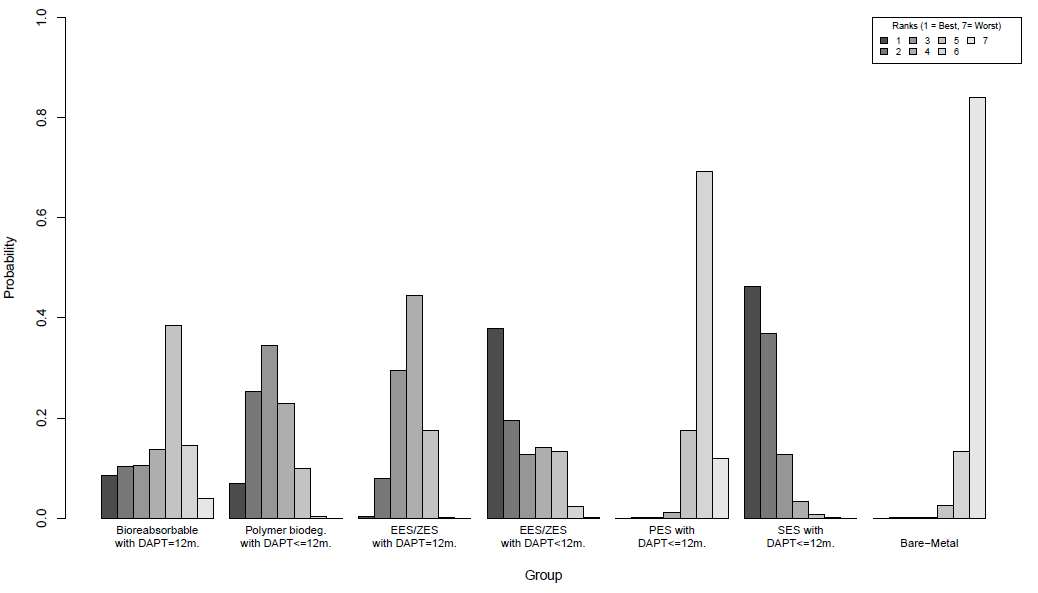


**Figure S10. SUCRA values for target lesion revascularization.**


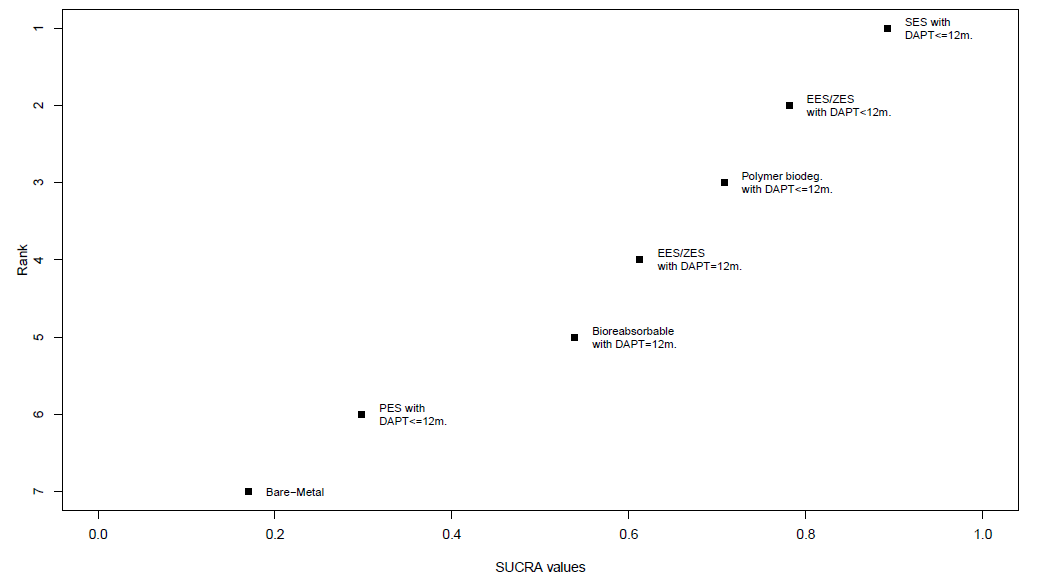


**Figure S11. Rank probabilities for all cause death.**


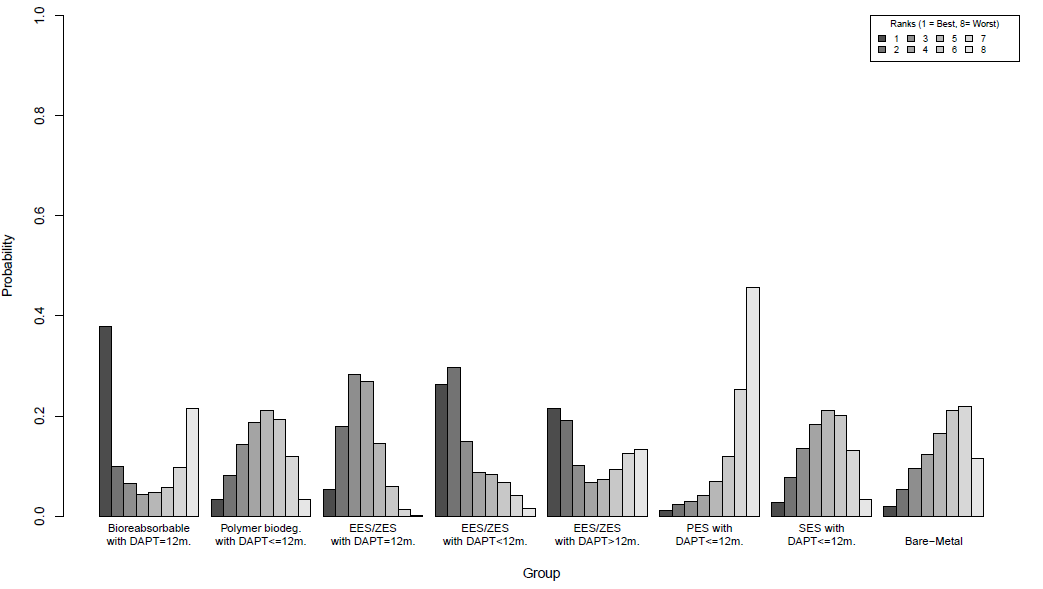


**Figure S12. SUCRA values for all cause death.**


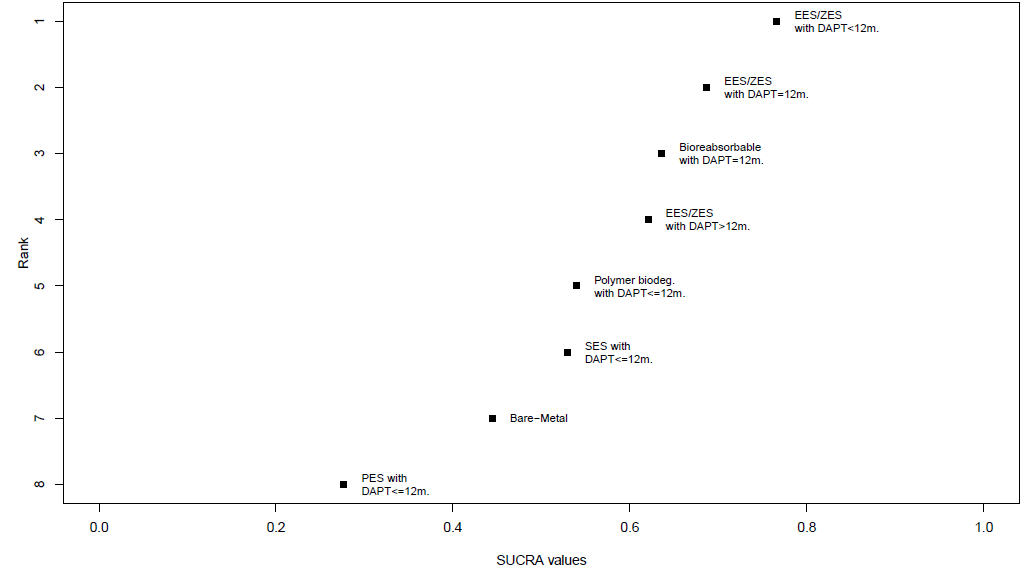


**Figure S13. Rank probabilities for cardiovascular death.**


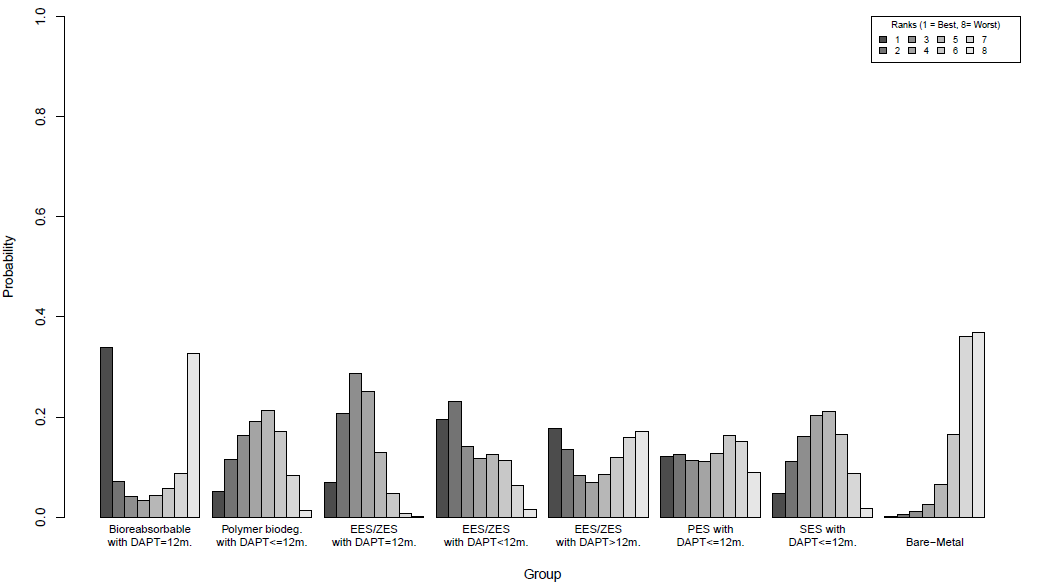


**Figure S14. SUCRA values for cardiovascular death.**


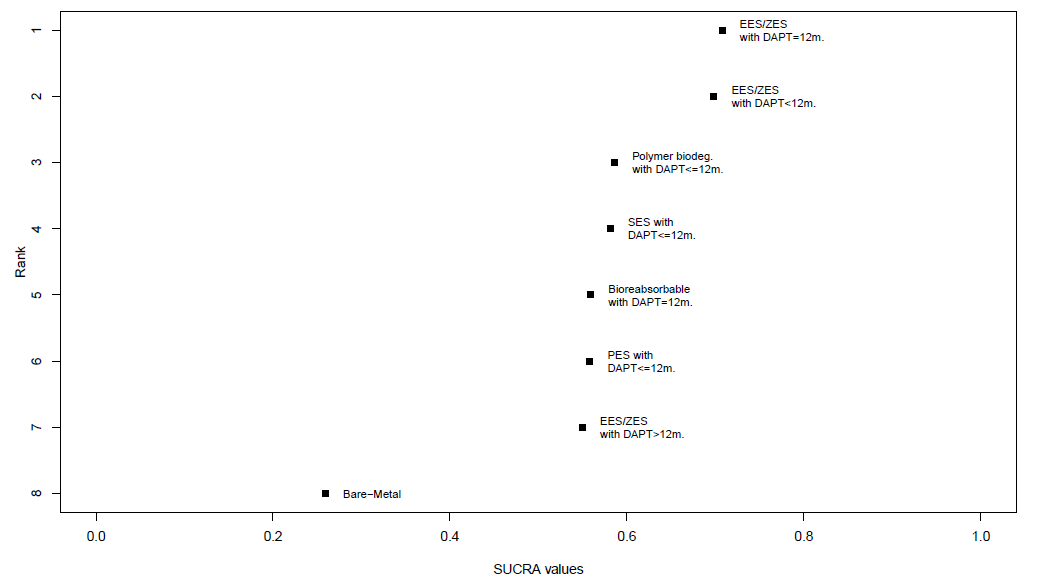


**Figure S15. Rank probabilities for major bleedings**

**
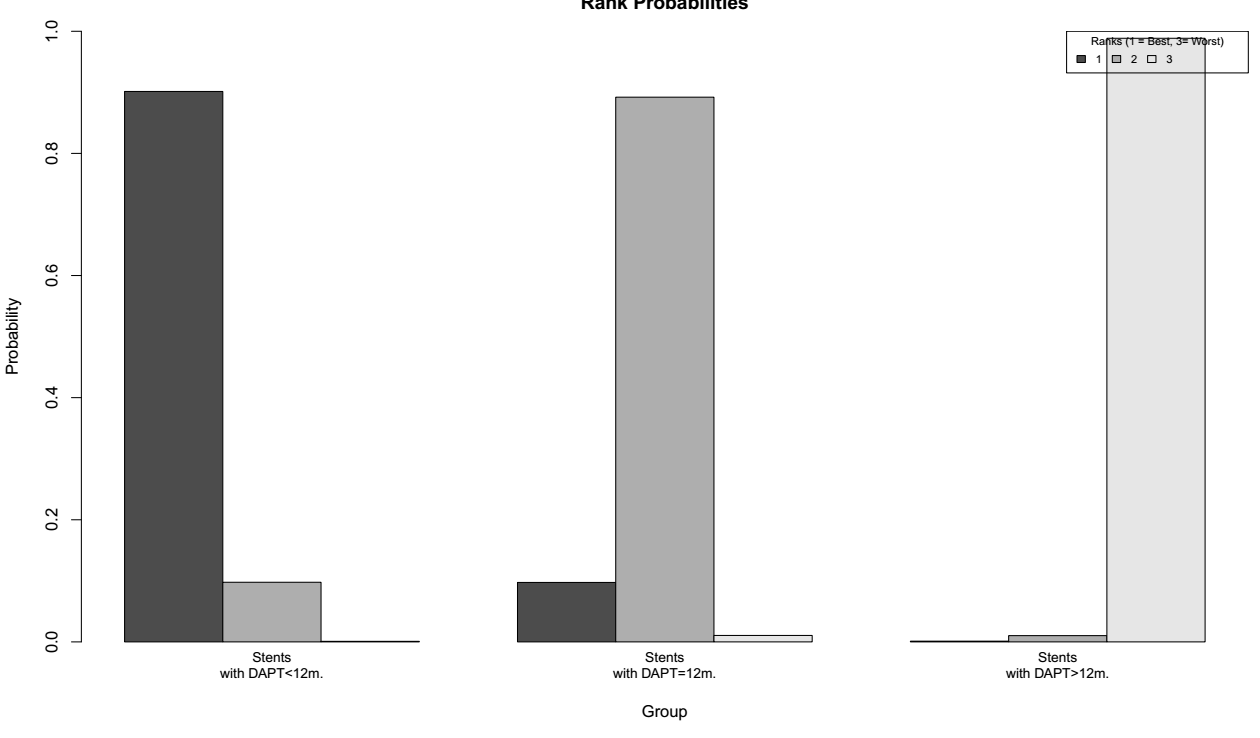
**

**Figure S16. SUCRA values for major bleedings**

**
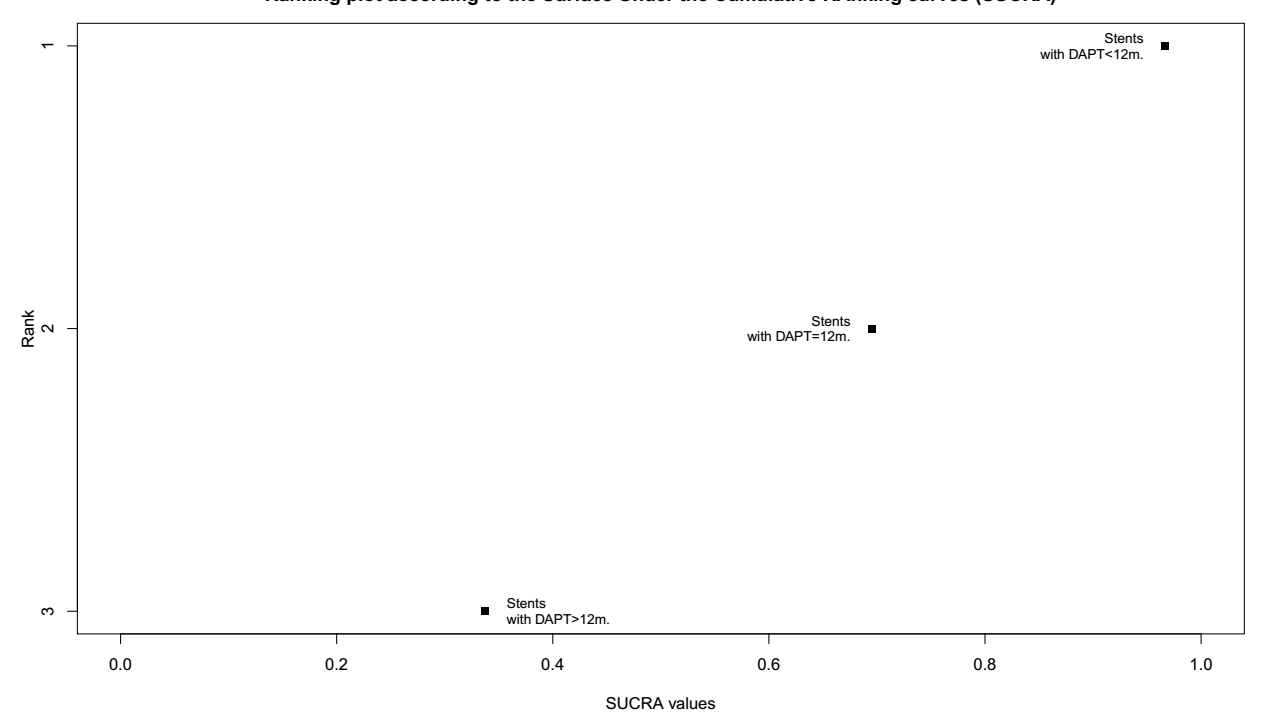
**

**REFERENCES.**

1. Claessen BE, Beijk MA, Legrand V, et al. Two-year clinical, angiographic, and  intravascular ultrasound follow-up of the XIENCE V everolimus-eluting stent in the treatment of patients with de novo native coronary artery lesions: the SPIRIT II trial. *Circ Cardiovasc Interv.* 2009;2(4):339-347.
2. Stone GW, Midei M, Newman W, et al. Comparison of an everolimus-eluting stent and a paclitaxel-eluting stent in patients with coronary artery disease: a randomized trial. *JAMA.* 2008;299(16):1903-1913.
3. Brener SJ, Kereiakes DJ, Simonton CA, et al. Everolimus-eluting stents inpatients undergoing percutaneous coronary intervention: final 3-year results of the Clinical Evaluation of the XIENCE V Everolimus Eluting Coronary Stent System in the Treatment of Subjects With de Novo Native Coronary Artery Lesions trial. Am Heart J. 2013 Dec;166(6):1035-42.
4. Kedhi E, Joesoef KS, McFadden E, et al. Second-generation everolimus-eluting and paclitaxel-eluting stents in real-life practice (COMPARE): a randomised trial. *Lancet.* 2010;375(9710):201-209.
5. Grube E, Chevalier B, Smits P, et al.. The SPIRIT V study: a clinical evaluation of the XIENCE V everolimus-eluting coronary stent system in the treatment of patients with de novo coronary artery lesions. *JACC Cardiovasc Interv.* 2011;4(2):168-175 .
6. Kimura T, Morimoto T, Natsuaki M, et al. RESET Investigators. Comparison of everolimus-eluting and sirolimus-eluting coronary stents: 1-year outcomes from the Randomized Evaluation of Sirolimus-eluting Versus Everolimus-eluting stent Trial (RESET). Circulation. 2012 Sep 4;126(10):1225-36.
7. Jensen LO, Thayssen P, Hansen HS, et al. Scandinavian Organization for Randomized Trials With Clinical Outcome IV (SORT OUT IV) Investigators. Randomized comparison of everolimus-eluting and sirolimus-eluting stents in patients treated with percutaneous coronary intervention: the Scandinavian Organization for Randomized Trials with Clinical Outcome IV (SORT OUT IV). Circulation. 2012 Mar 13;125(10):1246-55.
8. Park KW, Chae IH, Lim DS, et al.. Everolimus-Eluting Versus Sirolimus-Eluting Stents in Patients Undergoing Percutaneous Coronary Intervention The EXCELLENT (Efficacy of Xience/Promus Versus Cypher to Reduce Late Loss After Stenting) Randomized Trial. *J Am Coll Cardiol.* 2011;58(18):1844-1854
9. Park DW, Kim YH, Song HG, et al. Comparison of Everolimus- and Sirolimus-Eluting Stents in Patients With Long Coronary Artery Lesions A Randomized LONG-DES-III (Percutaneous Treatment of LONG Native Coronary Lesions With Drug-Eluting Stent-III) Trial. *JACC Cardiovasc Interv.* 2011;4(10):1096-1103
10. Kim WJ, Lee SW, Park SW, et al. Randomized comparison of everolimus-eluting stent versus sirolimus-eluting stent implantation for de novo coronary artery disease in patients with diabetes mellitus (ESSENCE-DIABETES): results from the ESSENCE-DIABETES trial. *Circulation.* 2011;124(8):886-892
11. Sabaté M, Brugaletta S, Cequier A, et al. The EXAMINATION trial (Everolimus-Eluting Stents Versus Bare-Metal Stents in ST-Segment Elevation Myocardial Infarction): 2-year results from a multicenter randomized controlled trial. JACC Cardiovasc Interv. 2014 Jan;7(1):64-71.
12. Kaiser C, Galatius S, Erne P, et al. Drug-eluting versus bare-metal stents in large coronary arteries. *N Engl J Med.* 2010;363(24):2310-2319.
13. Park DW, Kim YH, Yun SC, et al. Comparison of zotarolimus-eluting stents with sirolimus- and paclitaxel-eluting stents for coronary revascularization: the ZEST (comparison of the efficacy and safety of zotarolimus-eluting stent with sirolimus-eluting and paclitaxel-eluting stent for coronary lesions) randomized trial. *J Am Coll Cardiol.* 2010;56(15):1187-1195.
14. Kang WC, Ahn T, Lee K, et al. Comparison of zotarolimus-eluting stents versus sirolimus- eluting stents versus paclitaxel-eluting stents for primary percutaneous coronary intervention in patients with ST-elevation myocardial infarction: results from the Korean Multicentre Endeavor (KOMER) acute myocardial infarction (AMI) trial. *EuroIntervention.* 2011.
15. Briguori C, Airoldi F, Visconti G, et al. Novel approaches for preventing or limiting events in diabetic patients (Naples-diabetes) trial: a randomized comparison of 3 drug-eluting stents in diabetic patients. *Circ Cardiovasc Interv.* 2011;4(2):121-129
16. Kandzari DE, Mauri L, Popma JJ, et al. Late-term clinical outcomes with zotarolimus- and sirolimus-eluting stents.5-year follow-up of the ENDEAVOR III (A Randomized Controlled Trial of theMedtronic Endeavor Drug [ABT-578] Eluting Coronary Stent System Versus the CypherSirolimus-Eluting Coronary Stent System in De Novo Native Coronary ArteryLesions). JACC Cardiovasc Interv. 2011 May;4(5):543-50.
17. Rasmussen K, Maeng M, Kaltoft A, et al. Efficacy and safety of zotarolimus-eluting and sirolimus-eluting coronary stents in routine clinical care (SORT OUT III): a randomised controlled superiority trial. *Lancet.* 2010;375(9720):1090-1099.
18. Byrne RA, Kastrati A, Massberg S, et al. ISAR-TEST 4 Investigators. Biodegradable polymer versus permanent polymer drug-eluting stents and everolimus- versus sirolimus-eluting stents in patients with coronary artery disease: 3-year outcomes from a randomized clinical trial. J Am Coll Cardiol. 2011 Sep 20;58(13):1325-31.
19. Byrne RA, Kastrati A, Tiroch K, et al. ISAR-TEST-2 Investigators. 2-year clinical and angiographic outcomes from a randomized trial of polymer-free dual drug-eluting stents versus polymer-based Cypher and Endeavor drug-eluting stents. J Am Coll Cardiol. 2010 Jun 8;55(23):2536-43.
20. Leon MB, Mauri L, Popma JJ, et al. A randomized comparison of the ENDEAVOR zotarolimus-eluting stent versus the TAXUS paclitaxel-eluting stent in de novo native coronary lesions 12-month outcomes from the ENDEAVOR IV trial. *J Am Coll Cardiol.* 2010;55(6):543-554.
21. Fajadet J, Wijns W, Laarman GJ, et al. Randomized, double-blind, multicenter study of the Endeavor zotarolimus-eluting phosphorylcholine-encapsulated stent for treatment of native coronary artery lesions: clinical and angiographic results of the ENDEAVOR II trial. *Circulation.* 2006;114(8):798-806.
22. Xu Bo, Yang Y, Yuan Z, Du Z, Wong SC, Généreux P, Lu S; RESOLUTE China RCT Investigators. Zotarolimus- and paclitaxel-eluting stents in an all-comer population in China: the RESOLUTE China randomized controlled trial. JACC Cardiovasc Interv. 2013 Jul;6(7):664-70.
23. Sabaté M, Windecker S, Iñiguez A, et al. Everolimus-eluting bioresorbable stent vs. durable polymer everolimus-eluting metallic stent in patients with ST-segment elevation myocardial infarction: results of the randomized ABSORB ST-segment elevation myocardial infarction-TROFI II trial. Eur Heart J. 2016 Jan 14;37(3):229-40.
24. Puricel S, Arroyo D, Corpataux N, et al. Comparison of everolimus- and biolimus-eluting coronary stents with everolimus-eluting bioresorbable vascular scaffolds. J Am Coll Cardiol. 2015 Mar 3;65(8):791-801.
25. Serruys PW, Chevalier B, Dudek D, et al.A bioresorbable everolimus-eluting scaffold versus a metallic everolimus-eluting stent for ischaemic heart disease caused by de-novo native coronary artery lesions (ABSORB II): an interim 1-year analysis of clinical and procedural secondary outcomes from a randomised controlled trial. Lancet. 2015 Jan 3;385(9962):43-54.
26. Kimura T, Kozuma K, Tanabe K, et al. ABSORB Japan Investigators. A randomized trial evaluating everolimus-eluting Absorb bioresorbable scaffolds vs.everolimus-eluting metallic stents in patients with coronary artery disease:ABSORB Japan. Eur Heart J. 2015 Dec 14;36(47):3332-42.
27. Gao R, Yang Y, Han Y, et al. ABSORB China Investigators. Bioresorbable Vascular Scaffolds Versus Metallic Stents in Patients With Coronary Artery Disease: ABSORB China Trial. J Am Coll Cardiol. 2015 Dec1;66(21):2298-309.
28. Feres F, Costa RA, Abizaid A,et al. Three vs twelve months of dual antiplatelet therapy after zotarolimus-eluting stents: the OPTIMIZE randomized trial. JAMA. 2013 Dec 18;310(23):2510-22.
29. Valgimigli M, Borghesi M, Tebaldi M, Vranckx P, Parrinello G, Ferrari R;PROlonging Dual antiplatelet treatment after Grading stent-induced Intimal hyperplasia studY Investigators. Should duration of dual antiplatelet therapy depend on the type and/or potency of implanted stent? A pre-specified analysis from the PROlonging Dual antiplatelet treatment after Grading stent-induced Intimal hyperplasia studY (PRODIGY). Eur Heart J. 2013 Mar;34(12):909-19.
30. Kaul U, Bangalore S, Seth A, Arambam P, Abhaychand RK, Patel TM, Banker D, Abhyankar A, Mullasari AS, Shah S, Jain R, Kumar PR, Bahuleyan CG; TUXEDO–India Investigators. Paclitaxel-Eluting versus Everolimus-Eluting Coronary Stents in Diabetes. N Engl J Med. 2015 Oct 29;373(18):1709-19.
31. Urban P, Meredith IT, Abizaid A, Pocock SJ, Carrié D, Naber C, Lipiecki J, Richardt G, Iñiguez A, Brunel P, Valdes-Chavarri M, Garot P, Talwar S, Berland J, Abdellaoui M, Eberli F, Oldroyd K, Zambahari R, Gregson J, Greene S, Stoll HP, Morice MC; LEADERS FREE Investigators. Polymer-free Drug-Coated Coronary Stents in Patients at High Bleeding Risk. N Engl J Med. 2015 Nov 19;373(21):2038-47.
32. Natsuaki M, Kozuma K, Morimoto T, et al. Final 3-Year Outcome of a Randomized Trial Comparing Second-Generation Drug-Eluting Stents Using Either Biodegradable Polymer or Durable Polymer: NOBORI Biolimus-Eluting Versus XIENCE/PROMUS Everolimus-Eluting Stent Trial. Circulation: Cardiovascular Interventions 2015;**8**(10).
33. Windecker S, Haude M, Neumann FJ, et al. Comparison of a novel biodegradable polymer sirolimus-eluting stent with a durable polymer everolimus-eluting stent: results of the randomized BIOFLOW-II trial. Circ Cardiovasc Interv. 2015 Feb;8(2):e001441.
34. Saito S, Valdes-Chavarri M, Richardt G, et al. CENTURY II Investigators. A randomized, prospective, intercontinental evaluation of a bioresorbable polymer sirolimus-eluting coronary stent system: the CENTURY II (Clinical Evaluation of New Terumo Drug-Eluting Coronary Stent System in the Treatment of Patients with Coronary Artery Disease) trial. Eur Heart J. 2014 Aug 7;35(30):2021-31
35. Mauri L, Kereiakes DJ, Yeh RW, et al. DAPT Study Investigators. Twelve or 30 months of dual antiplatelet therapy after drug-eluting stents. N Engl J Med. 2014 Dec 4;371(23):2155-66.
36. de Belder A, de la Torre Hernandez JM, Lopez-Palop R, O'Kane P, Hernandez Hernandez F, Strange J, Gimeno F, Cotton J, Diaz Fernandez JF, Carrillo Saez P, Thomas M, Pinar E, Curzen N, Baz JA, Cooter N, Lozano I, Skipper N, Robinson D, Hildick-Smith D. A prospective randomized trial of everolimus-eluting stents versus bare-metal stents in octogenarians: the XIMA Trial (Xience or Vision Stents for the Management of Angina in the Elderly). Journal of the American College of Cardiology 2014;63(14):1371-5.
37. Kim BK, Shin DH, Hong MK, Park HS, Rha SW, Mintz GS, Kim JS, Kim JS, Lee SJ, Kim HY, Hong BK, Kang WC, Choi JH, Jang Y. Clinical impact of intravascular ultrasound-guided chronic total occlusion intervention with zotarolimus-eluting versus biolimus-eluting stent implantation randomized study. Circulation: Cardiovascular Interventions 2015;**8**(7).
38. Gao R, Han Y, Yang Y, Zhang J, Hou Y, Wang H, Li H, Fang Q, Yu B, Xu B, Allocco DJ, Dawkins KD. PLATINUM China: a prospective, randomized investigation of the platinum chromium everolimus-eluting stent in de novo coronary artery lesions. Catheterization and cardiovascular interventions : official journal of the Society for Cardiac Angiography & Interventions 2015;85 Suppl 1:716-23.
39. Raungaard B, Jensen LO, Tilsted HH, Christiansen EH, Maeng M, Terkelsen CJ, Krusell LR, Kaltoft A, Kristensen SD, Botker HE, Thuesen L, Aaroe J, Jensen SE, Villadsen AB, Thayssen P, Veien KT, Hansen KN, Junker A, Madsen M, Ravkilde J, Lassen JF. Zotarolimus-eluting durable-polymer-coated stent versus a biolimus-eluting biodegradable-polymer-coated stent in unselected patients undergoing percutaneous coronary intervention (SORT OUT VI): a randomised non-inferiority trial. Lancet 2015;385(9977):1527-35.
40. Valgimigli M, Patialiakas A, Thury A, et al. Zotarolimus-eluting versus bare-metal stents in uncertain drug-eluting stent candidates. Journal of the American College of Cardiology 2015;65(8):805-15.
41. Stefanini GG, Kalesan B, Serruys PW, et al. Long-term clinical outcomes of biodegradable polymer biolimus-eluting stents versus durable polymer sirolimus-eluting stents in patients with coronary artery disease (LEADERS): 4 year follow-up of a randomised non-inferiority trial. Lancet. 2011 Dec 3;378(9807):1940-8.
42. Kadota K, Muramatsu T, Iwabuchi M,et al.Randomized comparison of the Nobori biolimus A9-eluting stent with the sirolimus-eluting stent in patients with stenosis in native coronary arteries. Catheter Cardiovasc Interv. 2012 Nov 1;80(5):789-96.
43. Wijns W, Steg PG, Mauri L, et al. PROTECT Steering Committee and Investigators. Endeavour zotarolimus-eluting stent reduces stent thrombosis and improves clinical outcomes compared with cypher sirolimus-eluting stent: 4-year results of the PROTECT randomized trial. Eur Heart J. 2014 Oct 21;35(40):2812-20.
44. Velders MA, Hofma SH, Brouwer J, de Vries CJ, Queré M, van Boven AJ. Two-Year Results of an Open-Label Randomized Comparison of Everolimus-Eluting Stents and Sirolimus-Eluting Stents. PLoS ONE 2013;**8**(6).
45. Schulz-Schüpke S, Byrne RA, Ten Berg JM,et al. Intracoronary Stenting and Antithrombotic Regimen: Safety And EFficacy of 6 Months Dual Antiplatelet Therapy After Drug-Eluting Stenting (ISAR-SAFE) Trial Investigators. ISAR-SAFE: a randomized,double-blind, placebo-controlled trial of 6 vs. 12 months of clopidogrel therapy after drug-eluting stenting. Eur Heart J. 2015 May 21;36(20):1252-63.
46. Christiansen EH, Jensen LO, Thayssen P, Tilsted HH, Krusell LR, Hansen KN,Kaltoft A, Maeng M, Kristensen SD, Bøtker HE, Terkelsen CJ, Villadsen AB,Ravkilde J, Aarøe J, Madsen M, Thuesen L, Lassen JF; Scandinavian Organization for Randomized Trials with Clinical Outcome (SORT OUT) V investigators.Biolimus-eluting biodegradable polymer-coated stent versus durable polymer-coated sirolimus-eluting stent in unselected patients receiving percutaneous coronary intervention (SORT OUT V): a randomised non-inferiority trial. Lancet. 2013 Feb 23;381(9867):661-9.
47. Di Lorenzo E, Sauro R, Capasso M, Lanni F, Lanzillo T, Carbone G, Manganelli F, Palmieri V, Serino V, Pagliuca MR, Rosato G, Suryapranata H, De Luca G.Long-term results of the randomized comparison of everolimus-eluting stents andsirolimus-eluting stent in patients with ST elevation myocardial infarction(RACES-MI trial). Int J Cardiol. 2016 Jan 1;202:177-82.
48. Vlachojannis GJ, Smits PC, Hofma SH, Togni M, Vázquez N, Valdés M, Voudris V, Puricel S, Slagboom T, Goy JJ, den Heijer P, van der Ent M. Long-term clinical outcomes of biodegradable polymer biolimus-eluting stents versus durable polymer everolimus-eluting stents in patients with coronary artery disease: three-year follow-up of the COMPARE II (Abluminal biodegradable polymer biolimus-eluting stent versus durable polymer everolimus-eluting stent) trial. EuroIntervention.2015 Jul;11(3):272-9.
49. Chevalier B, Wijns W, Silber S, Garcia E, Serra A, Paunovic D, Serruys P; NOBORI 1 investigators. Five-year clinical outcome of the Nobori drug-eluting coronary stent system in the treatment of patients with coronary artery disease: final results of the NOBORI 1 trial. EuroIntervention. 2015 Sep;11(5):549-54.
50. Zbinden R1, Piccolo R2, Heg D3, Roffi M4, Kurz DJ1, Muller O5, Vuilliomenet A6, Cook S7, Weilenmann D8, Kaiser C9, Jamshidi P10, Franzone A2, Eberli F1, Jüni P11, Windecker S12, Pilgrim T2. Ultrathin Strut Biodegradable Polymer Sirolimus-Eluting Stent Versus Durable-Polymer Everolimus-Eluting Stent for Percutaneous Coronary Revascularization: 2-Year Results of the BIOSCIENCE Trial. J Am Heart Assoc. 2016 Mar 15;5(3).
51. Lee JY, Park DW, Kim YH, et al.Comparison of biolimus A9-eluting (Nobori) and everolimus-eluting (Promus Element) stents in patients with de novo native long coronary artery lesions: a randomized Long Drug-Eluting Stent V trial. Circ Cardiovasc Interv. 2014 Jun;7(3):322-9.
52. Räber L, Kelbæk H, Taniwaki M, et al. COMFORTABLE AMI Trial Investigators. Biolimus-eluting stents with biodegradable polymer versus bare-metal stents in acute myocardial infarction: two-year clinical results of the COMFORTABLE AMI trial. Circ Cardiovasc Interv. 2014 Jun;7(3):355-64.
53. Kereiakes DJ, Meredith IT, Windecker S, Lee Jobe R, Mehta SR, Sarembock IJ, Feldman RL, Stein B, Dubois C, Grady T, Saito S, Kimura T, Christen T, Allocco DJ, Dawkins KD. Efficacy and safety of a novel bioabsorbable polymer-coated, everolimus-eluting coronary stent: the EVOLVE II Randomized Trial. Circ Cardiovasc Interv. 2015 Apr;8(4).
54. Ellis SG, Kereiakes DJ, Metzger DC, Caputo RP, Rizik DG, Teirstein PS, LittMR, Kini A, Kabour A, Marx SO, Popma JJ, McGreevy R, Zhang Z, Simonton C, StoneGW; ABSORB III Investigators. Everolimus-Eluting Bioresorbable Scaffolds forCoronary Artery Disease. N Engl J Med. 2015 Nov 12;373(20):1905-15. doi:10.1056/NEJMoa1509038. Epub 2015 Oct 12.
55. Gilard M, Barragan P, Noryani AA, et al. 6-versus 24-month dual antiplatelet therapy after implantation of drug-eluting stents in patients nonresistant to aspirin: the randomized, multicenter ITALIC trial. J Am Coll Cardiol. 2015 Mar 3;65(8):777-86.
56. Silber S, Windecker S, Vranckx P, Serruys PW. Unrestricted randomised use of two new generation drug-eluting coronary stents: 2-year patient-related versus stent-related outcomes from the RESOLUTE All Comers trial. *Lancet.* 2011;377:1241-47.
57. Von Birgelen C, Basalus MW, Tandjung K,et al.A randomized controlled trial in second-generation zotarolimus-eluting Resolute stents versus everolimus-eluting Xience V stents in real-world patients: the TWENTE trial. J Am Coll Cardiol. 2012 Apr 10;59(15):1350-61.
58. Stone GW, Teirstein PS, Meredith IT,et al.PLATINUM Trial Investigators. A prospective, randomized evaluation of a novel everolimus-eluting coronary stent: the PLATINUM (a Prospective, Randomized, Multicenter Trial to Assess an Everolimus-Eluting Coronary Stent System [PROMUS Element] for the Treatment of Up to Two de NovoCoronary Artery Lesions) trial. J Am Coll Cardiol. 2011 Apr 19;57(16):1700-8.
59. Lee CW, Ahn JM, Park DW, et al. Optimal duration of dual antiplatelet therapy after drug-eluting stent implantation: a randomized, controlled trial. Circulation. 2014 Jan 21;129(3):304-12.
60. Helft G, Steg PG, Le Feuvre C,et al.OPTImal DUAL Antiplatelet Therapy TrialInvestigators. Stopping or continuing clopidogrel 12 months after drug-eluting stent placement: the OPTIDUAL randomized trial. Eur Heart J. 2016 Jan 21;37(4):365-74.
61. Mehilli J, Richardt G, Valgimigli M, et al. ISAR-LEFT-MAIN 2 Study Investigators.Zotarolimus- versus everolimus-eluting stents for unprotected left main coronary artery disease. J Am Coll Cardiol. 2013 Dec 3;62(22):2075-82.
62. von Birgelen C, Sen H, Lam MK, et al. Third-generation zotarolimus-eluting and everolimus-eluting stents in all-comer patients requiring a percutaneous coronary intervention (DUTCH PEERS):a randomised, single-blind, multicentre, non-inferiority trial. Lancet. 2014 Feb 1;383(9915):413-23.
63. Park KW, Kang SH, Kang HJ, et al. HOST–ASSURE Investigators. A randomized comparison of platinum chromium-based everolimus-eluting stents versus cobalt chromium-based Zotarolimus-Eluting stents in all-comers receiving percutaneous coronary intervention: HOST-ASSURE (harmonizing optimal strategy for treatment of coronary artery stenosis-safety & effectiveness of drug-eluting stents & anti-platelet regimen), a randomized, controlled, noninferiority trial.J Am Coll Cardiol. 2014 Jul 1;63(25 Pt A):2805-16.
64. Colombo A, Chieffo A, Frasheri A, Garbo R, Masotti-Centol M, Salvatella N, Oteo Dominguez JF, Steffanon L, Tarantini G, Presbitero P, Menozzi A, Pucci E, Mauri J, Cesana BM, Giustino G, Sardella G. Second-generation drug-eluting stent implantation followed by 6- versus 12-month dual antiplatelet therapy: the SECURITY randomized clinical trial. J Am Coll Cardiol. 2014 Nov 18-25;64(20):2086-97.
